# Supplementary material
Source: publisher figshare collection journal article supplement (https://sage.figshare.com/ndownloader/files/14144912)
Supplement: Supplementary file 1 [file 14144912]

**Table S3. Comparison of model performance metrics for an illustrative model<sup>1</sup> based on the original super learner (SL) library and an expanded library<sup>2</sup>**

|                                                           | <u>Original SL library</u> | <u>Expanded SL library</u> |
|-----------------------------------------------------------|----------------------------|----------------------------|
| Statistical power                                         | 43.6                       | 39.8                       |
| Proportional regret                                       | 0.3                        | 0.4                        |
| Lower bound coverage of attained marginal improvement     | 97.8                       | 96.6                       |
| Average lower bound around estimated marginal improvement | 0.0                        | 0.0                        |
| Full coverage for attained marginal improvement           | 88.8                       | 88.2                       |

<sup>1</sup>Model parameters: 30% outcome prevalence, 5% optimal marginal improvement (OMI), dense signal, n = 300 patients per arm, 20 noise variables

<sup>2</sup>The expanded library includes two additional neural networks, size 5 and 10, each paired separately with the randomForest and corP screening algorithms (i.e., a total of four learners)
